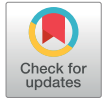

COMMENT ON YANG ET AL.

## GLP-1RAs for Ischemic Stroke Prevention in Patients With Type 2 Diabetes Without Established Atherosclerotic Cardiovascular Disease. *Diabetes Care* 2022;45:1184–1192

*Diabetes Care* 2022;45:e181 | <https://doi.org/10.2337/dc22-0701>

We read with great interest the recent article in *Diabetes Care* by Yang et al. (1). The authors conducted a retrospective cohort study to evaluate the effectiveness of glucagon-like peptide 1 receptor agonists (GLP-1RAs) for ischemic stroke prevention from the Taiwan National Health Insurance Research Database. While these results are important, we would like to highlight several methodological issues and provide our perspective.

First, it is unclear whether type 2 diabetes (T2D) had been well controlled. Diabetes may increase the risk of stroke (2). National Health Insurance guidelines in Taiwan require that GLP-1RAs be used only in patients with T2D who have received the maximum tolerated dose of metformin or sulfonylurea and still do not have adequate blood glucose control. It is difficult to determine whether the risk reduction is due to better disease control with an additional drug or to the effect of GLP-1RAs.

Second, the selection of the control group for the study could cause potential bias. The comparison group is non-GLP-1RA users. However, metformin is the

first-line choice for T2D, and the newer second-line choices for T2D should include GLP-1RAs, dipeptidyl peptidase 4 inhibitors, and sodium-glucose cotransporter 2 inhibitors (3). We suggest that the authors conduct a further comparison of these classes of drugs to enhance the credibility of the results. In addition, the experimental group's index date was set as the first prescription record for GLP-1RAs, while the control group's index date was a randomly generated date after T2D diagnosis. The period from study entry to the index date may be different between the experimental and control groups. Such a classification may cause potential "immortal time bias," which can overestimate the effect of treatment (4). The authors should clarify this point.

Third, there are residual confounders that should be considered. Although the authors had stratified for comorbidities and performed propensity score matching to balance possible confounders, we believe that there are still important residual confounders, such as the duration of diabetes, the severity of the kidney disease, and the patient's income and

Cheng-Hsien Hung,<sup>1</sup> Fu-Shun Yen,<sup>2</sup> and James Cheng-Chung Wei<sup>3,4,5</sup>

education level, that may limit the interpretation of the study results.

The authors provided us with important and valuable findings. However, we suggest that addressing the abovementioned important issues will make this study, which is based on an adequate database, more convincing.

**Duality of Interest.** No potential conflicts of interest relevant to this article were reported.

### References

1. Yang YS, Chen HH, Huang CN, Hsu CY, Hu KC, Kao CH. GLP-1RAs for ischemic stroke prevention in patients with type 2 diabetes without established atherosclerotic cardiovascular disease. *Diabetes Care* 2022;45:1184–1192
2. Chen R, Ovbiagele B, Feng W. Diabetes and stroke: epidemiology, pathophysiology, pharmaceuticals and outcomes. *Am J Med Sci* 2016;351:380–386
3. American Diabetes Association Professional Practice Committee. 9. Pharmacologic approaches to glycemic treatment: *Standards of Medical Care in Diabetes—2022*. *Diabetes Care* 2022;45(Suppl. 1):S125–S143
4. Suissa S. Immortal time bias in pharmaco-epidemiology. *Am J Epidemiol* 2008;167:492–499

<sup>1</sup>Department of Pharmacy, Chang Bing Show Chwan Memorial Hospital, Changhua, Taiwan

<sup>2</sup>Dr. Yen's Clinic, Taoyuan, Taiwan

<sup>3</sup>Department of Allergy, Immunology, and Rheumatology, Chung Shan Medical University Hospital, Taichung, Taiwan

<sup>4</sup>Institute of Medicine, College of Medicine, Chung Shan Medical University, Taichung, Taiwan

<sup>5</sup>Graduate Institute of Integrated Medicine, China Medical University, Taichung, Taiwan

Corresponding author: James Cheng-Chung Wei, [jccwei@gmail.com](mailto:jccwei@gmail.com)

© 2022 by the American Diabetes Association. Readers may use this article as long as the work is properly cited, the use is educational and not for profit, and the work is not altered. More information is available at <https://www.diabetesjournals.org/journals/pages/license>.
